CORRECTION

# Correction: Correction: Wild-Type Mouse Models to Screen Antisense Oligonucleotides for Exon-Skipping Efficacy in Duchenne Muscular Dystrophy

The *PLOS ONE* Staff

There is an error in the Correction published on November 15, 2018. In the last sentence of the caption for [S2 Fig](#), “*mdx*” should be “*C57BL6*.” The publisher apologizes for the error. The correct sentence is: No difference was observed between treated and untreated *C57BL6* mice.

Please view [S2 Fig](#) and the complete, correct [S2 Fig](#) caption below.

## Supporting information

**S2 Fig. Routine hematoxylin and eosin staining for examining muscle morphology .** Hematoxylin and eosin staining of TA tissue sections from treated *C57BL6* mice with 2 µg PMO, 5 µg PNA and 5 µg 2’Ome PS by local injection at different time-points e.g. 48 hr, 2 and 4 weeks after injection, and *C57BL6* normal controls. Scale Bar = 100 µm. No difference was observed between treated and untreated *C57BL6* mice.

(TIF)

## References

1. Cao L, Han G, Gu B, Yin H (2014) Wild-Type Mouse Models to Screen Antisense Oligonucleotides for Exon-Skipping Efficacy in Duchenne Muscular Dystrophy. *PLoS ONE* 9(11): e111079. <https://doi.org/10.1371/journal.pone.0111079> PMID: 25365558
2. Cao L, Han G, Gu B, Yin H (2018) Correction: Wild-Type Mouse Models to Screen Antisense Oligonucleotides for Exon-Skipping Efficacy in Duchenne Muscular Dystrophy. *PLoS ONE* 13(11): e0207817. <https://doi.org/10.1371/journal.pone.0207817> PMID: 30440030

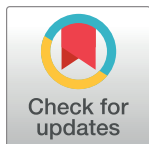

## OPEN ACCESS

**Citation:** The *PLOS ONE* Staff (2019) Correction: Correction: Wild-Type Mouse Models to Screen Antisense Oligonucleotides for Exon-Skipping Efficacy in Duchenne Muscular Dystrophy. *PLoS ONE* 14(2): e0212820. <https://doi.org/10.1371/journal.pone.0212820>

**Published:** February 20, 2019

**Copyright:** © 2019 The PLOS ONE Staff. This is an open access article distributed under the terms of the [Creative Commons Attribution License](#), which permits unrestricted use, distribution, and reproduction in any medium, provided the original author and source are credited.
